# Supplementary material for: Polymorphs of two dimensional phosphorus and arsenic: insight from an evolutionary search
Source: Royal Society of Chemistry journal article supplement (doi:10.1039/c6cp08807d), 2017-01-01
Supplement: c6cp08807d1.pdf [file c6cp08807d1.pdf]

# Polymorphs of Two Dimensional Phosphorus and Arsenic: an Insight from Evolutionary Search Supplementary Information

Suhas Nahas,<sup>1,\*</sup> Akash Bajaj,<sup>1,†</sup> and Somnath Bhowmick<sup>1,‡</sup>

<sup>1</sup>*Department of Material Science and Engineering,  
Indian Institute of Technology, Kanpur 208016, India  
(Dated: March 20, 2017)*

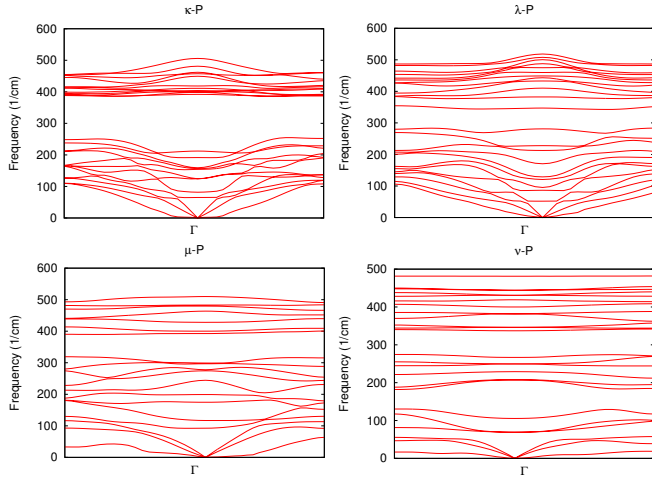

FIG. 1. Phonon dispersion of newly predicted monolayer phosphorus allotropes, shown along two high symmetry directions from  $\Gamma$  point.

| Allotrope     | GGA bandgap (eV) | HSE bandgap (eV) |
|---------------|------------------|------------------|
| $\kappa$ -P   | 1.54             | 2.34             |
| $\lambda$ -P  | 1.21             | 1.84             |
| $\mu$ -P      | 1.43             | 2.18             |
| $\nu$ -P      | 1.71             | 2.60             |
| $\kappa$ -As  | 1.34             | 1.94             |
| $\lambda$ -As | 0.83             | 1.46             |
| $\mu$ -As     | 1.16             | 1.84             |
| $\nu$ -As     | 1.12             | 1.76             |

TABLE I. GGA and HSE bandgap of newly discovered monolayer P and As allotropes.

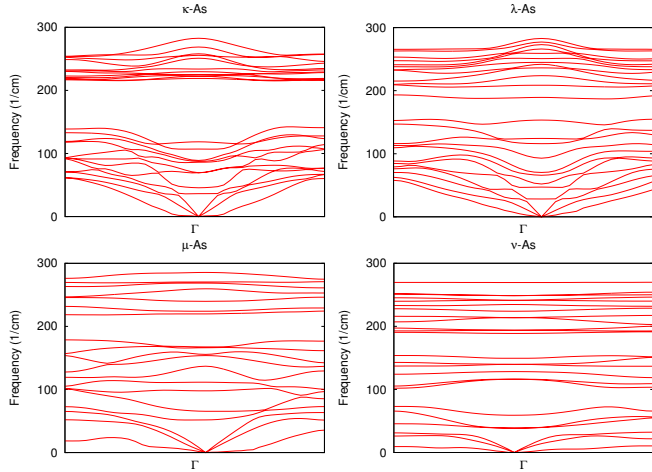

FIG. 2. Phonon dispersion of newly predicted monolayer arsenic allotropes, shown along two high symmetry directions from  $\Gamma$  point.

## I. CRYSTAL STRUCTURE OF NEWLY PREDICTED MONOLAYER P ALLOTROPES

Atomic positions are given in terms of lattice vectors  $\vec{a}, \vec{b}, \vec{c}$ .

$\kappa$ -P:

$$\begin{aligned}\vec{a} &= (9.7134, 0.0000, 0.0000) \\ \vec{b} &= (0.0000, 3.3011, 0.0000) \\ \vec{c} &= (0.0000, 0.0000, 25.0000)\end{aligned}$$

ATOMIC POSITIONS

P 0.1744 0.0000 0.5345  
P 0.3256 0.0000 0.4655  
P 0.4538 0.5000 0.5025  
P 0.0462 0.5000 0.4975  
P 0.6062 0.5000 0.4343  
P 0.8938 0.5000 0.5657  
P 0.7503 0.0000 0.4550  
P 0.7497 0.0000 0.5450

$\lambda$ -P:

$$\begin{aligned}\vec{a} &= (9.4213, 0.0000, 0.0000) \\ \vec{b} &= (0.0000, 3.2753, 0.0000) \\ \vec{c} &= (0.0000, 0.0000, 25.0000)\end{aligned}$$

ATOMIC POSITIONS

P 0.4245 0.5000 0.4047  
P -0.0043 0.5000 0.4103  
P 0.4195 0.5000 0.3149  
P 0.7674 0.5000 0.3784  
P 0.7812 0.0000 0.3174  
P 0.5537 0.0000 0.2846  
P 0.2760 0.0000 0.4258  
P 0.1020 0.0000 0.3629

$\mu$ -P:

$$\begin{aligned}\vec{a} &= (7.2373, 0.0000, 0.0000) \\ \vec{b} &= (0.0000, 4.5891, 0.0000) \\ \vec{c} &= (0.0000, 0.0000, 25.0000)\end{aligned}$$

ATOMIC POSITIONS

As 0.8389 0.4259 0.3125  
As 0.0677 0.7351 0.3299  
As 0.5775 0.6714 0.3021  
As 0.4006 0.2656 0.3204  
As 0.7751 0.2606 0.3934  
As 0.5458 0.9518 0.3757  
As 1.0371 1.0151 0.4035  
As 0.2141 0.4207 0.3847

$\nu$ -P:

$$\begin{aligned}\vec{a} &= (5.9500, 0.0000, 0.0000) \\ \vec{b} &= (-2.975, 5.1529, 0.0000) \\ \vec{c} &= (0.0000, 0.0000, 25.0000)\end{aligned}$$

ATOMIC POSITIONS

P 0.6495 -0.0118 0.4985  
P 0.5704 0.8538 0.4135  
P 0.0118 0.6612 0.4985  
P 0.1462 0.7166 0.4135  
P 0.3388 0.3505 0.4985  
P 0.2834 0.4296 0.4135  
P 0.3333 0.6667 0.5433  
P 0.0000 0.0000 0.5308

## II. CRYSTAL STRUCTURE OF NEWLY PREDICTED MONOLAYER AS ALLOTROPES

Atomic positions are given in terms of lattice vectors  $\vec{a}, \vec{b}, \vec{c}$ .

$\kappa$ -As:

$$\begin{aligned}\vec{a} &= (10.3246, 0.0000, 0.0000) \\ \vec{b} &= (0.0000, 3.6348, 0.0000) \\ \vec{c} &= (0.0000, 0.0000, 25.0000)\end{aligned}$$

ATOMIC POSITIONS

As 0.1722 0.0000 0.5384  
As 0.3278 0.0000 0.4616  
As 0.4603 0.5000 0.5039  
As 0.0397 0.5000 0.4961  
As 0.6113 0.5000 0.4259  
As 0.8887 0.5000 0.5741  
As 0.7649 0.0000 0.4511  
As 0.7351 0.0000 0.5489

$\lambda$ -As:

$$\begin{aligned}\vec{a} &= (9.9968, 0.0000, 0.0000) \\ \vec{b} &= (0.0000, 3.6070, 0.0000) \\ \vec{c} &= (0.0000, 0.0000, 25.0000)\end{aligned}$$

ATOMIC POSITIONS

As 0.4394 0.5000 0.4098  
As 0.0009 0.5000 0.4142  
As 0.4044 0.5000 0.3119  
As 0.7607 0.5000 0.3806  
As 0.7803 0.0000 0.3129  
As 0.5456 0.0000 0.2750  
As 0.2790 0.0000 0.4345  
As 0.1097 0.0000 0.3602

$\mu$ -As:

$$\begin{aligned}\vec{a} &= (7.8819, 0.0000, 0.0000) \\ \vec{b} &= (0.0000, 4.8449, 0.0000) \\ \vec{c} &= (0.0000, 0.0000, 25.0000)\end{aligned}$$

ATOMIC POSITIONS

As 0.8241 0.3699 0.3076  
As 0.0509 0.7154 0.3277  
As 0.5588 0.6324 0.2935  
As 0.3684 0.2175 0.3147  
As 0.7458 0.2439 0.3982  
As 0.5190 0.8993 0.3776  
As 1.0111 0.9804 0.4120  
As 0.2013 0.3961 0.3908

$\nu$ -As:

$$\begin{aligned}\vec{a} &= (6.3500, 0.0000, 0.0000) \\ \vec{b} &= (-3.175, 5.4993, 0.0000) \\ \vec{c} &= (0.0000, 0.0000, 25.0000)\end{aligned}$$

ATOMIC POSITIONS

As 0.6542 0.0093 0.4996  
As 0.5840 0.8557 0.4064  
As -0.0093 0.6449 0.4996  
As 0.1443 0.7283 0.4064  
As 0.3551 0.3458 0.4996  
As 0.2717 0.4160 0.4064  
As 0.3333 0.6667 0.5498  
As 0.0000 0.0000 0.5421
